# Supplementary material for: The Ecological Paw Print of Companion Dogs and Cats
Source: PubMed Central journal article supplement — Bioscience. 2019 May 22;69(6):467–74. doi: 10.1093/biosci/biz044 (PMC6551214; doi:10.1093/biosci/biz044), 2019-05-22
Supplement: biz044_supplemental_file.pdf [file biz044_supplemental_file.pdf]

## Annex 1: Application of the ecological footprint (ecological paw print) analysis

The Ecological paw print (EPP) has been derived from the Ecological footprint (EF), which calculates the area of productive land needed to support the consumption of resources, and to dispose the waste that is generated, for a given population (Shanahan and Carlsson Kanyama 2005, Wackernagel and Rees 1998a). EF is often used to measure humanity's overall impact on nature, by quantifying and analysing six main categories of ecologically productive areas including arable land, grazing land, forest land, fishing land, built-up land and energy land (Fu et al. 2015, Wackernagel and Rees 1998a). Companion animals' dietary EPP was calculated based on per capita data of dog's and cat's consumption of commercial dry food. We presumed that the proteins and fats in this food were from Chicken, while the carbohydrates were from cereal (maize, wheat and rice). Therefore, only the arable and grazing land-types were considered in the present study.

The equation of per capita dietary EPP is as shown below (Du et al. 2006, Liu et al. 2017):

$$EPP_{dietary} = \sum_{i=1}^n r_i \times C_i / Y_i$$

Where,

$i$  = the number of consumption items;  $r_i$  is equivalence factor;  $C_i$  = per capita consumption of item  $i$  (kg);  $Y_i$  = the annual average productivity in the world of item  $i$  (kg/ha).

To align the measurement units, the two land types should be converted using an equivalence factor (Table S1) (Liu et al. 2017, Wackernagel et al. 1999).

Table S1 The annual average productivity and equivalence factor of different land types

| Items   | Annual average productivity | Equivalence factor | Land type    |
|---------|-----------------------------|--------------------|--------------|
| Poultry | 33                          | 0.5                | Grazing land |
| Cereal  | 2744                        | 2.8                | Arable land  |

We used the raw chicken and cereal in the calculation process, and the equations of the raw chicken and cereal are as shown below:

$$Chicken_{raw}(kg) = \frac{(protein_{commercial\ food} + fat_{commercial\ food})\% \times food\ consumption\ (kg)}{(protein_{raw\ chicken} + fat_{raw\ chicken})\%}$$

$$Cereal_{raw}(kg) = \frac{carbohydrate_{commercial\ food}\% \times food\ consumption(kg)}{carbohydrate_{raw\ cereal}\%}$$

The average percentages of protein (17.33%) and fat (17.98%) in raw whole chicken and the percentage of carbohydrate (73.3%) in raw cereal were calculated according to the data from the Department of Agriculture, United States (USDA). We assume that the weights of protein and fat in raw chicken and the carbohydrates in raw cereal do not change during the process of industrial production (the conversion rate is one to one), which means that one unit of each item in raw chicken or cereal equate to one unit of commercial food.

### Greenhouse gas (GHG) emissions

The greenhouse gas (GHG) emission is an indicator directly related to global warming and climate change (Francke and Castro 2013). In the present study, we mainly focused on companion dogs and cats' indirect GHG emissions from food consumption.

The per capita GHG emissions of companion animals are calculated as follows (Xu and Lan 2017):

$$\text{GHG} = \sum I_i \times EF_i$$

Where,

$i$  is the number of items of food inputs,  $I_i$  is the food inputs of item  $i$  (kg),  $EF_i$  is the GHG emission factor (kg CO<sub>2</sub>/kg) (Table S2).

Table S2 Greenhouse gas emissions for the food commodities (Gerber et al. 2013, Nemecek et al. 2012)

| Food category | GHG emissions (kgCO <sub>2</sub> e/kg) |
|---------------|----------------------------------------|
| Poultry Meat  | 5.40                                   |
| Cereal        | 1.15                                   |
| Maize         | 0.49                                   |
| Wheat         | 0.58                                   |
| Rice          | 2.38                                   |

Note: the GHG emission of cereal was the average score of maize, wheat and rice.

### Box: Three cases: China, Japan and the Netherlands

Basic information about the nutrients and calorie content of companion animals' commercial dry food in China, Japan and the Netherlands is presented in Table 1.

Table 1 Percentage of nutrients and calorie contents in commercial dry dog and cat food

|                   | Dog     |        |                 | Cat     |        |                 |
|-------------------|---------|--------|-----------------|---------|--------|-----------------|
|                   | China   | Japan  | The Netherlands | China   | Japan  | The Netherlands |
| Protein (%)       | 25.21   | 25.67  | 24.70           | 29.15   | 26.00  | 33.18           |
| Fat (%)           | 13.80   | 14.67  | 8.33            | 13.17   | 7.50   | 12.76           |
| Ash (%)           | 9.23    | 8.00   | 6.25            | 8.39    | 8.00   | 7.70            |
| Fiber (%)         | 3.72    | 3.83   | 2.33            | 4.66    | 6.25   | 3.58            |
| Moisture (%)      | 10.44   | 10.00  | 13.44           | 8.75    | 10.00  | 10.12           |
| Carbohydrate (%)  | 37.60   | 37.83  | 44.95           | 35.88   | 42.25  | 32.66           |
| Calorie (kcal/kg) | 3371.35 | 3533.3 | 3145.80         | 3395.50 | 3445.0 | 3389.00         |

According to the data we collected from these three countries, we quantified individual and total companion dog and cat food consumption (Table 2).

Table 2 Companion animal numbers and their commercial dry food consumptions in three countries

|                                          | dog       |          |                 | cat       |         |                 |
|------------------------------------------|-----------|----------|-----------------|-----------|---------|-----------------|
|                                          | China     | Japan    | The Netherlands | China     | Japan   | The Netherlands |
| Per capita food consumption (kg/year)    | 48-243    | 19-123   | 61-247          | 20-34     | 18-31   | 20-33           |
| Total numbers (million)                  | 27.4      | 10.35    | 1.8             | 58.1      | 9.96    | 3.2             |
| Total food consumption (million kg/year) | 1308-6656 | 194-1271 | 109-445         | 1168-1954 | 178-311 | 64-106          |

### The environmental impacts of companion dogs and cats in the Netherlands, Japan and China

We quantified companion dogs and cats' dietary EPP, GHG emissions and energy consumption according to their food consumption of commercial dry food in these three countries (i.e., the Netherlands, Japan and China). The dietary EPP of an average-sized dog in China was 0.82 to 4.19 ha. year<sup>-1</sup>, while for a cat was 0.36 to 0.63 ha. year<sup>-1</sup>. Given that China has a large companion dog and cat population; their total environmental impacts are undoubtedly significant. Specifically, if we assume that all companion dogs and cats eat commercial dry food in China, their dietary EPP is calculated to be between 43.4 and 151.4 million ha. year<sup>-1</sup>, which is equivalent to the dietary EF of 72.3 to 252.3 million Chinese people in a year. GHG emissions from this dry-food consumption are between 16.7 and 57.4 million tons per year. The dietary EPP of an average-sized dog in Japan was 0.33 to 2.19 ha. year<sup>-1</sup>, while for a cat was 0.32 to 0.56 ha. year<sup>-1</sup>. The dietary EPP of all companion dogs and cats in Japan lies between 6.6 and 28.3 million ha. year<sup>-1</sup>, equivalent to the dietary EF of 4.62 to 19.79 million Japanese people. The GHG emissions from Japanese dog and cat food consumption were 2.52 to 10.70 million tons, which is equivalent to the GHG emissions resulting from the food consumption of between 1.17 and 4.95 million Japanese people. With regard to companion dogs and cats in the Netherlands, our results showed that the dietary EPP of an average-sized dog was 0.90 to 3.66 ha. year<sup>-1</sup>, while for a cat, between 0.40 and 0.67 ha. year<sup>-1</sup>. The dietary EPP of all companion dogs and cats in the Netherlands was 2.9 to

8.7 million ha. year<sup>-1</sup>, which was equivalent to the whole EF of 0.50 to 1.51 million Dutch people. The GHG emissions from Dutch dog and cat food consumption was in the range of 1.09 to 3.28 million tons, which is equivalent to between 94 and 284 thousand Dutch peoples' GHG emissions regarding their total resource consumption (Table 3, Table 4).

Our results show that the dietary EPP of one companion dog relying on commercial dry food in the Netherlands or in China was around two times that of a dog relying on commercial dry food in Japan. Consequently, their GHG emissions and energy consumption were higher than their Japanese equivalents. China has the largest number of companion dogs among the three countries and the Netherlands has the least. Therefore, the dietary EPP, carbon emissions and energy consumption of all companion dogs in China were the largest, while these values in the Netherlands were the smallest (Table 3). With regard to cats, our results show that dietary EPP, GHG emissions and energy consumption per capita for companion cats are similar across the three countries. However, although per capita environmental impacts were similar, their total environmental impacts were quite different. The total companion cats in China, due to their greater numbers, consumed more resources and, to a large extent, contributed to greater environmental impact than companion cats in the Netherlands and Japan (Table 4).

Additionally, we also found that many companion dogs in the Netherlands and China consumed more energy than their actual needs, while in all three countries the calorie intake of companion cats was sufficient to offset their energy requirements.

Table 3 The dietary ecological paw print (EPP) and greenhouse gas (GHG) emissions of companion dogs in the Netherlands, Japan and China.

|                              |                 | EPP (ha)     | GHG emission (ton) |
|------------------------------|-----------------|--------------|--------------------|
| Per capita average-sized dog | The Netherlands | 0.90-3.66    | 0.349-1.424        |
|                              | Japan           | 0.33-2.19    | 0.127-0.831        |
|                              | China           | 0.82-4.19    | 0.313-1.592        |
| Lifetime of one dog          | The Netherlands | 10.77-43.93  | 4.188-17.087       |
|                              | Japan           | 4.01-26.28   | 1.522-9.972        |
|                              | China           | 9.89-50.32   | 3.756-19.104       |
|                              |                 | (million ha) | (million ton)      |
| Total dogs                   | The Netherlands | 1.62-6.59    | 0.608-2.480        |
|                              | Japan           | 3.40-22.70   | 1.312-8.596        |
|                              | China           | 22.5-114.8   | 8.576-43.621       |

Note: An average-sized dog weights 10-20kg.

Table 4 The dietary ecological paw print (EPP) and greenhouse gas (GHG) emissions of companion cats in the Netherlands, Japan and China.

|                              |                 | EPP (ha)     | GHG emission (ton) |
|------------------------------|-----------------|--------------|--------------------|
| Per capita average-sized cat | The Netherlands | 0.40-0.67    | 0.150-0.251        |
|                              | Japan           | 0.32-0.56    | 0.121-0.211        |
|                              | China           | 0.36-0.63    | 0.141-0.237        |
| Lifetime of one cat          | The Netherlands | 5.62-9.39    | 2.102-3.511        |
|                              | Japan           | 4.46-7.80    | 1.693-2.959        |
|                              | China           | 5.04-8.82    | 1.974-3.318        |
|                              |                 | (million ha) | (million ton)      |
| Total cats                   | The Netherlands | 1.28-2.14    | 0.480-0.803        |
|                              | Japan           | 3.20-5.60    | 1.204-2.105        |
|                              | China           | 20.90-36.60  | 8.192-13.770       |

Note: An average-sized cat weights 2-6kg.

## Reference

- Alton R. 2009. Polluting pets: the devastating impact of man's best friend. *The Independent*.
- Amiot C, Bastian B, Martens P. 2016. People and companion animals: it takes two to tango. *BioScience* 66:552-560.
- Birmingham EN, Thomas DG, Cave NJ, Morris PJ, Butterwick RF, German AJ. 2014. Energy requirements of adult dogs: a meta-analysis. *PloS one* 9:e109681.
- Birmingham EN, Thomas DG, Morris PJ, Hawthorne AJ. 2010. Energy requirements of adult cats. *British journal of nutrition* 103:1083-1093.
- Beverland MB, Farrelly F, Lim EAC. 2008. Exploring the dark side of pet ownership: Status- and control-based pet consumption. *Journal of Business Research* 61:490-496.
- Beynen AC. 2015. Green Pet Foods. *Creature Companion*, March:54-55.
- Collier R, Beede D, Thatcher W, Israel L, Wilcox C. 1982. Influences of Environment and Its Modification on Dairy Animal Health and Production<sup>1</sup>. *Journal of Dairy Science* 65:2213-2227.
- Csutora M, Móznér Z, Tabi A. 2009. Sustainable consumption: from escape strategies towards real alternatives. *Sustainable Consumption Conference. Sustainable Consumption, Production, and Communication*.
- Cutt H, Giles-Corti B, Knuiman M, Burke V. 2007. Dog ownership, health and physical activity: A critical review of the literature. *Health & place* 13:261-272.
- Du B, Zhang K, Song G, Wen Z. 2006. Methodology for an urban ecological footprint to evaluate sustainable development in China. *The International Journal of Sustainable Development & World Ecology* 13:245-254.
- Fleeman LM, Owens E. 2007. Applied animal nutrition. *Animal Physiotherapy: Assessment, Treatment and Rehabilitation of Animals*:14-31.
- Flynn CP. 2000. Battered women and their animal companions: Symbolic interaction between human and nonhuman animals. *Society & Animals* 8:99-127.
- Fowler V, Fuller M, Close W, Whittemore C. 2013. Energy requirements for the growing pig. Pages 151-156. *Energy metabolism. Proceedings of the 8th symposium. European association of animal production, publication*.
- Francke I, Castro J. 2013. Carbon and water footprint analysis of a soap bar produced in Brazil by Natura Cosmetics. *Water Resources and Industry* 1:37-48.
- Fu W, Turner JC, Zhao J, Du G. 2015. Ecological footprint (EF): An expanded role in calculating resource productivity (RP) using China and the G20 member countries as examples. *Ecological indicators* 48:464-471.
- Gerber PJ, Steinfeld H, Henderson B, Mottet A, Opio C, Dijkman J, Falcucci A, Tempio G. 2013. *Tackling climate change through livestock: a global assessment of emissions and mitigation opportunities. Food and Agriculture Organization of the United Nations (FAO)*.
- German AJ. 2006. The growing problem of obesity in dogs and cats. *The Journal of Nutrition* 136:1940S-1946S.
- Hammerly T, DuMont B. 2012. The Environmental Impact of Pets. *Green Teacher*:25.
- Hughes D. 1995. Animal welfare: the consumer and the food industry. *British Food Journal* 97:3-7.
- Knight A, Leitsberger M. 2016. Vegetarian versus Meat-Based Diets for Companion Animals. *Animals* 6:57.

Leenstra F, Vellinga T. 2011. Indication of the ecological foot print of companion animals : first survey, focussed on cats, dogs and horses in The Netherlands. . Lelystad. Report no.

Linder DE, Freeman LM. 2010. Evaluation of calorie density and feeding directions for commercially available diets designed for weight loss in dogs and cats. *Journal of the American Veterinary Medical Association* 236:74-77.

Liu H, Wang X, Yang J, Zhou X, Liu Y. 2017. The ecological footprint evaluation of low carbon campuses based on life cycle assessment: A case study of Tianjin, China. *Journal of Cleaner Production* 144:266-278.

Martens P, Enders-Slegers M-J, Walker JK. 2016. The emotional lives of companion animals: Attachment and subjective claims by owners of cats and dogs. *Anthrozoös* 29:73-88.

Morrison R, Reilly J, Penpraze V, Pendlebury E, Yam P. 2014. A 6 - month observational study of changes in objectively measured physical activity during weight loss in dogs. *Journal of Small Animal Practice* 55:566-570.

Mullis RA, Witzel AL, Price J. 2015. Maintenance energy requirements of odor detection, explosive detection and human detection working dogs. *PeerJ* 3:e767.

Nemecek T, Weiler K, Plassmann K, Schnetzer J, Gaillard G, Jefferies D, García-Suárez T, King H, i Canals LM. 2012. Estimation of the variability in global warming potential of worldwide crop production using a modular extrapolation approach. *Journal of Cleaner Production* 31:106-117.

Nutrition NRCCoA. 1971. Nutrient requirements of poultry. National Academies.

Okin GS. 2017. Environmental impacts of food consumption by dogs and cats. *PloS one* 12:e0181301.

PBL. 2013. Netherlands Environmental Assessment Agency (PBL) in Agency NEA, ed.

Peebles L. 2009. How big is a dog's eco-pawprint? (12 February 2017; <http://www.audubon.org/news/how-big-dogs-eco-pawprint>)

Pimentel D, Pimentel M. 2003. Sustainability of meat-based and plant-based diets and the environment. *The American journal of clinical nutrition* 78:660S-663S.

Rastogi N. 2010. The trouble with kibbles: The environmental impact of pet food. *Slate*.

Ravilious K. 2009. How green is your pet? *New Scientist* 204:46-47.

Reijnders L, Soret S. 2003. Quantification of the environmental impact of different dietary protein choices. *The American journal of clinical nutrition* 78:664S-668S.

Rushforth R, Moreau M. 2013. Finding Your Dog's Ecological Pawprint': A Hybrid EIO-LCA of Dog Food Manufacturing.

Schwartz L. 2014. The surprisingly large carbon paw print of your beloved pet. (12 February 2017; [http://www.salon.com/2014/11/20/the\\_surprisingly\\_large\\_carbon\\_paw\\_print\\_of\\_your\\_beloved\\_pet\\_partner/](http://www.salon.com/2014/11/20/the_surprisingly_large_carbon_paw_print_of_your_beloved_pet_partner/))

Shanahan H, Carlsson Kanyama A. 2005. Interdependence between consumption in the North and sustainable communities in the South. *International Journal of Consumer Studies* 29:298-307.

Su B, Koda N, Martens P. 2018a. How Japanese companion dog and cat owners' degree of attachment relates to the attribution of emotions to their animals. *PloS one* 13:e0190781.

Su B, Martens P. 2018. Environmental impacts of food consumption by companion dogs and cats in Japan. *Ecological indicators* 93:1043-1049.

Su B, Martens P, Enders-Slegers M-J. 2018b. A neglected predictor of environmental damage: The ecological paw print and carbon emissions of food consumption by companion dogs and cats in China. *Journal of Cleaner Production* 194:1-11.

Swanson KS, Carter RA, Yount TP, Aretz J, Buff PR. 2013. Nutritional sustainability of pet foods. *Advances in Nutrition: An International Review Journal* 4:141-150.

Vale, Vale. 2009. *Time to eat the dog? the real guide to sustainable living*. Thames & Hudson.

Wackernagel M, Onisto L, Bello P, Linares AC, Falfán ISL, Garcia JM, Guerrero AIS, Guerrero MGS. 1999. National natural capital accounting with the ecological footprint concept. *Ecological Economics* 29:375-390.

Wackernagel M, Rees W. 1998a. *Our ecological footprint: reducing human impact on the earth*. New Society Publishers.

---. 1998b. *Our ecological footprint: reducing human impact on the earth*. New Society Publishers.

Westhoek H, Rood T, van den Berg M, Janse J, Nijdam D, Reudink M, Stehfest E, Lesschen J, Oenema O, Woltjer G. 2011. *The protein puzzle: the consumption and production of meat, dairy and fish in the European Union*. Netherlands Environmental Assessment Agency.

William-Derry C. 2009. *Dogs VS. SUVs*. Sightline Institute.

Wirsenius S, Azar C, Berndes G. 2010. How much land is needed for global food production under scenarios of dietary changes and livestock productivity increases in 2030? *Agricultural systems* 103:621-638.

Wood L, Giles-Corti B, Bulsara M. 2005. The pet connection: Pets as a conduit for social capital? *Social science & medicine* 61:1159-1173.

Xu X, Lan Y. 2017. Spatial and temporal patterns of carbon footprints of grain crops in China. *Journal of Cleaner Production* 146:218-227.
